# Supplementary figures and images for: LKB1 is physiologically required for sleep from Drosophila melanogaster to the Mus musculus
Source: Oxford University Press journal article supplement (doi:10.1093/genetics/iyac082), 2022-05-17

**A**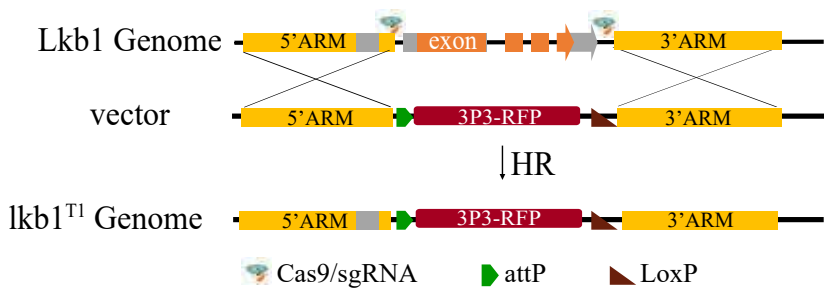**B**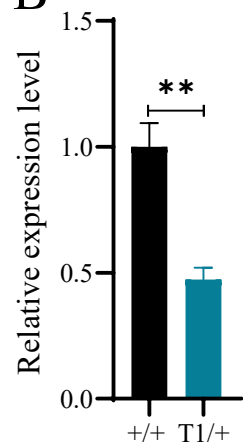**C**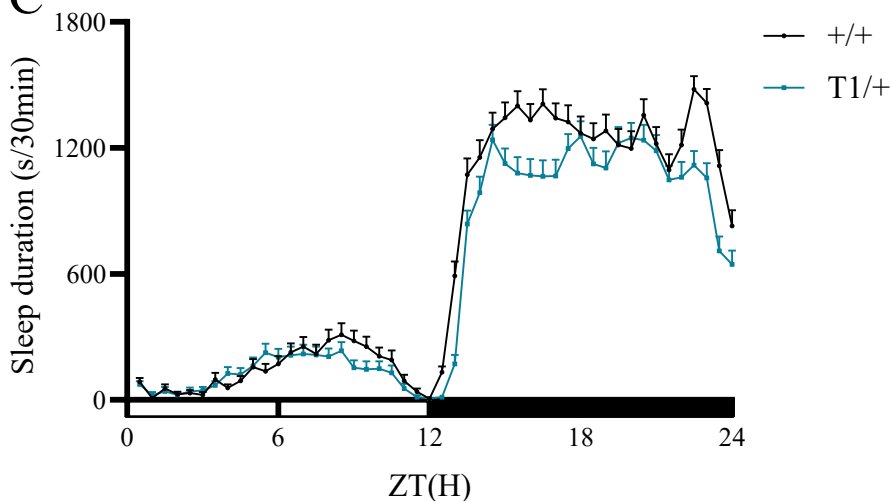**D**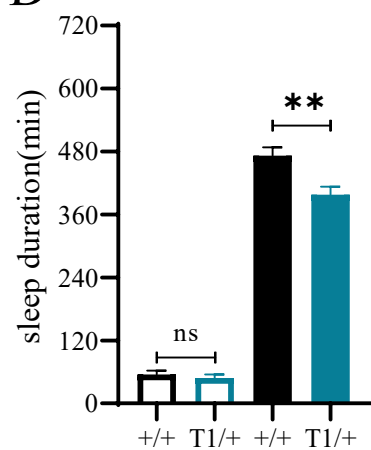**E**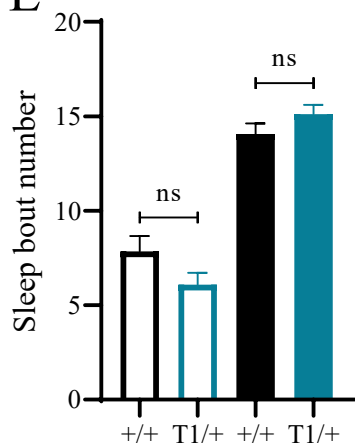**F**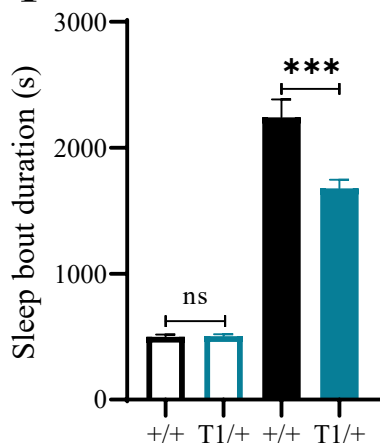**G**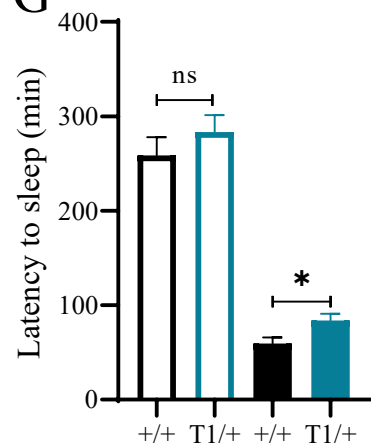

Supplement: iyac082_supplemental_material_1.pdf [file iyac082_supplemental_material_1.pdf]

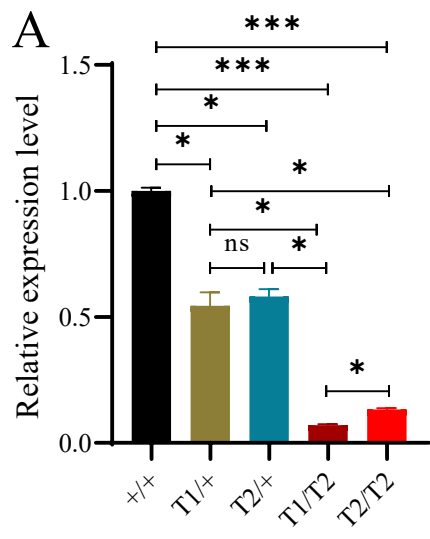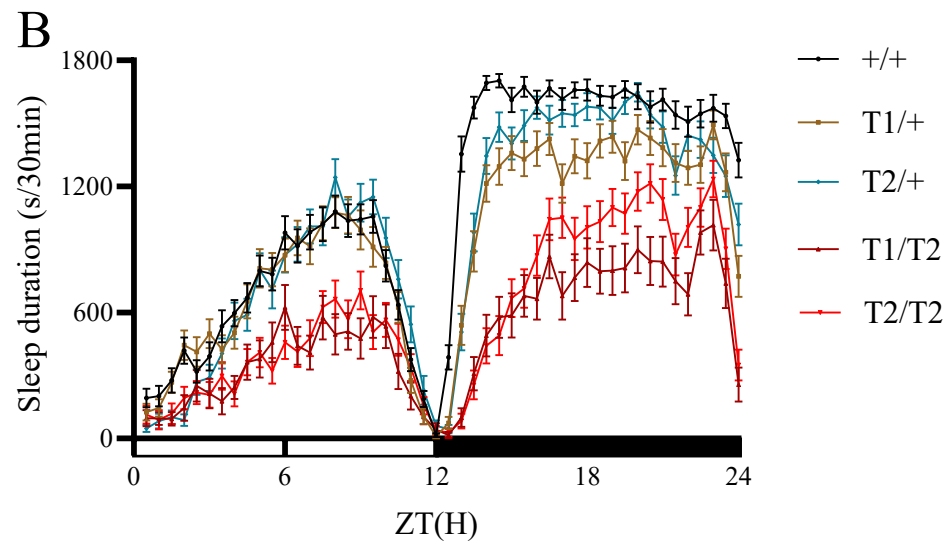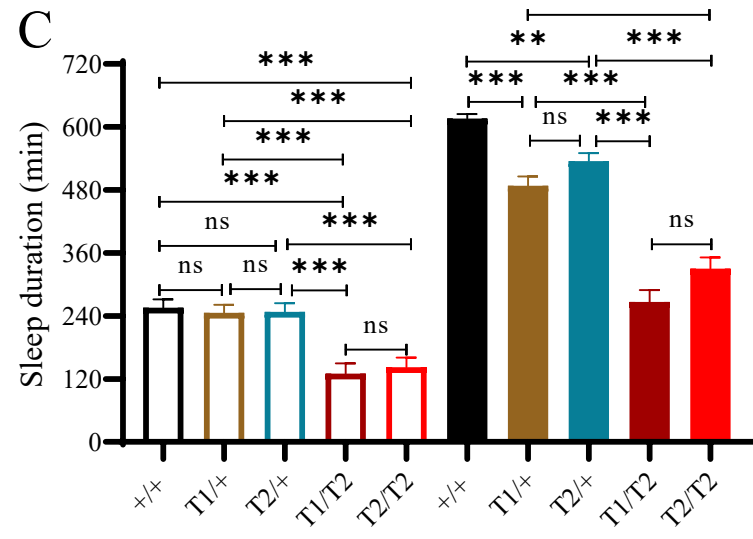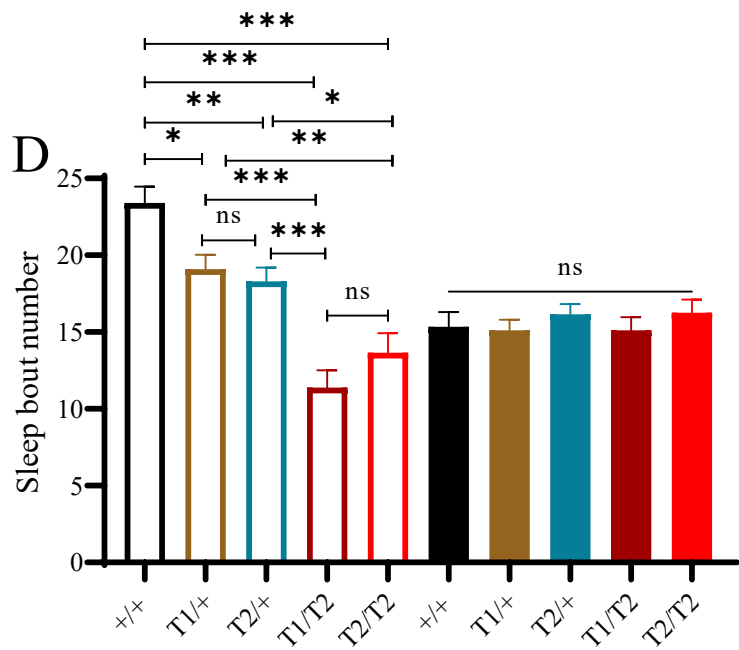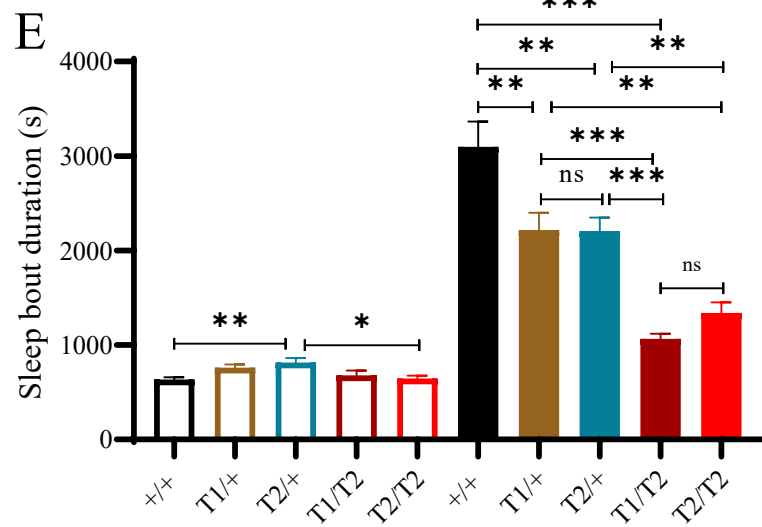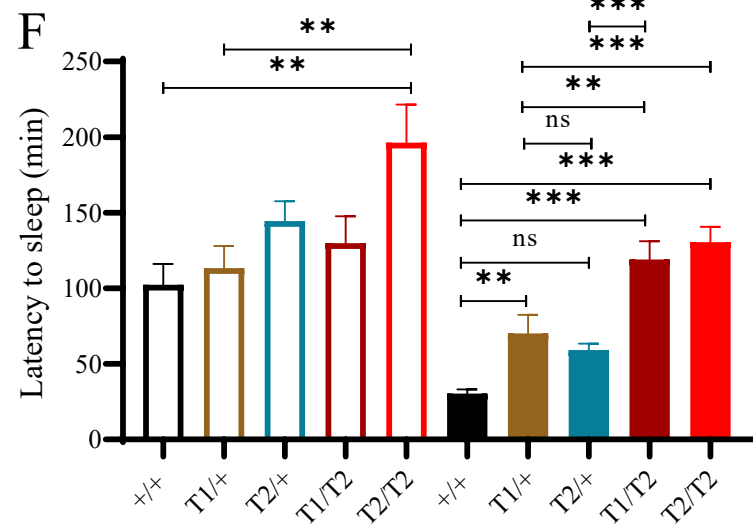

Supplement: iyac082_supplemental_material_2.pdf [file iyac082_supplemental_material_2.pdf]

A

lkb1<sup>T2</sup> Genome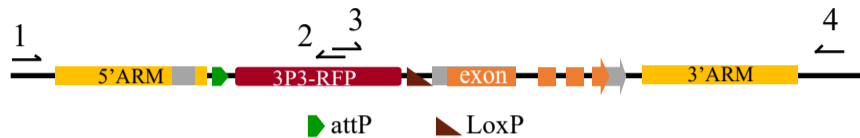

B

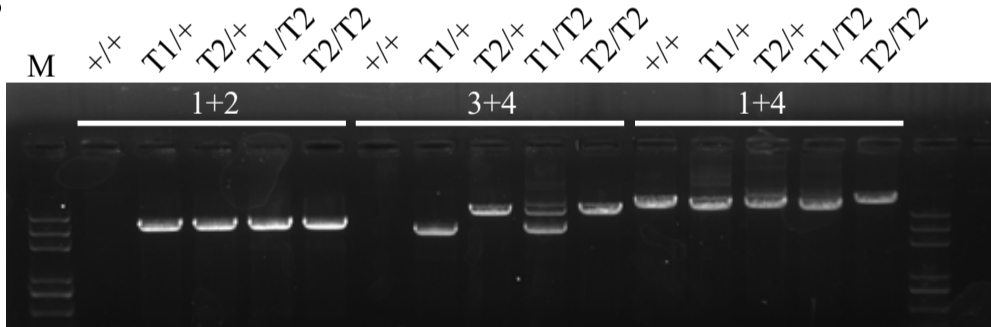

Supplement: iyac082_supplemental_material_3.pdf [file iyac082_supplemental_material_3.pdf]

Lkb1 Genome

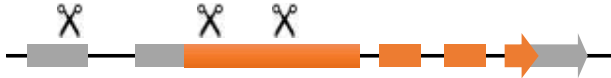

 sgRNA

Supplement: iyac082_supplemental_material_4.pdf [file iyac082_supplemental_material_4.pdf]

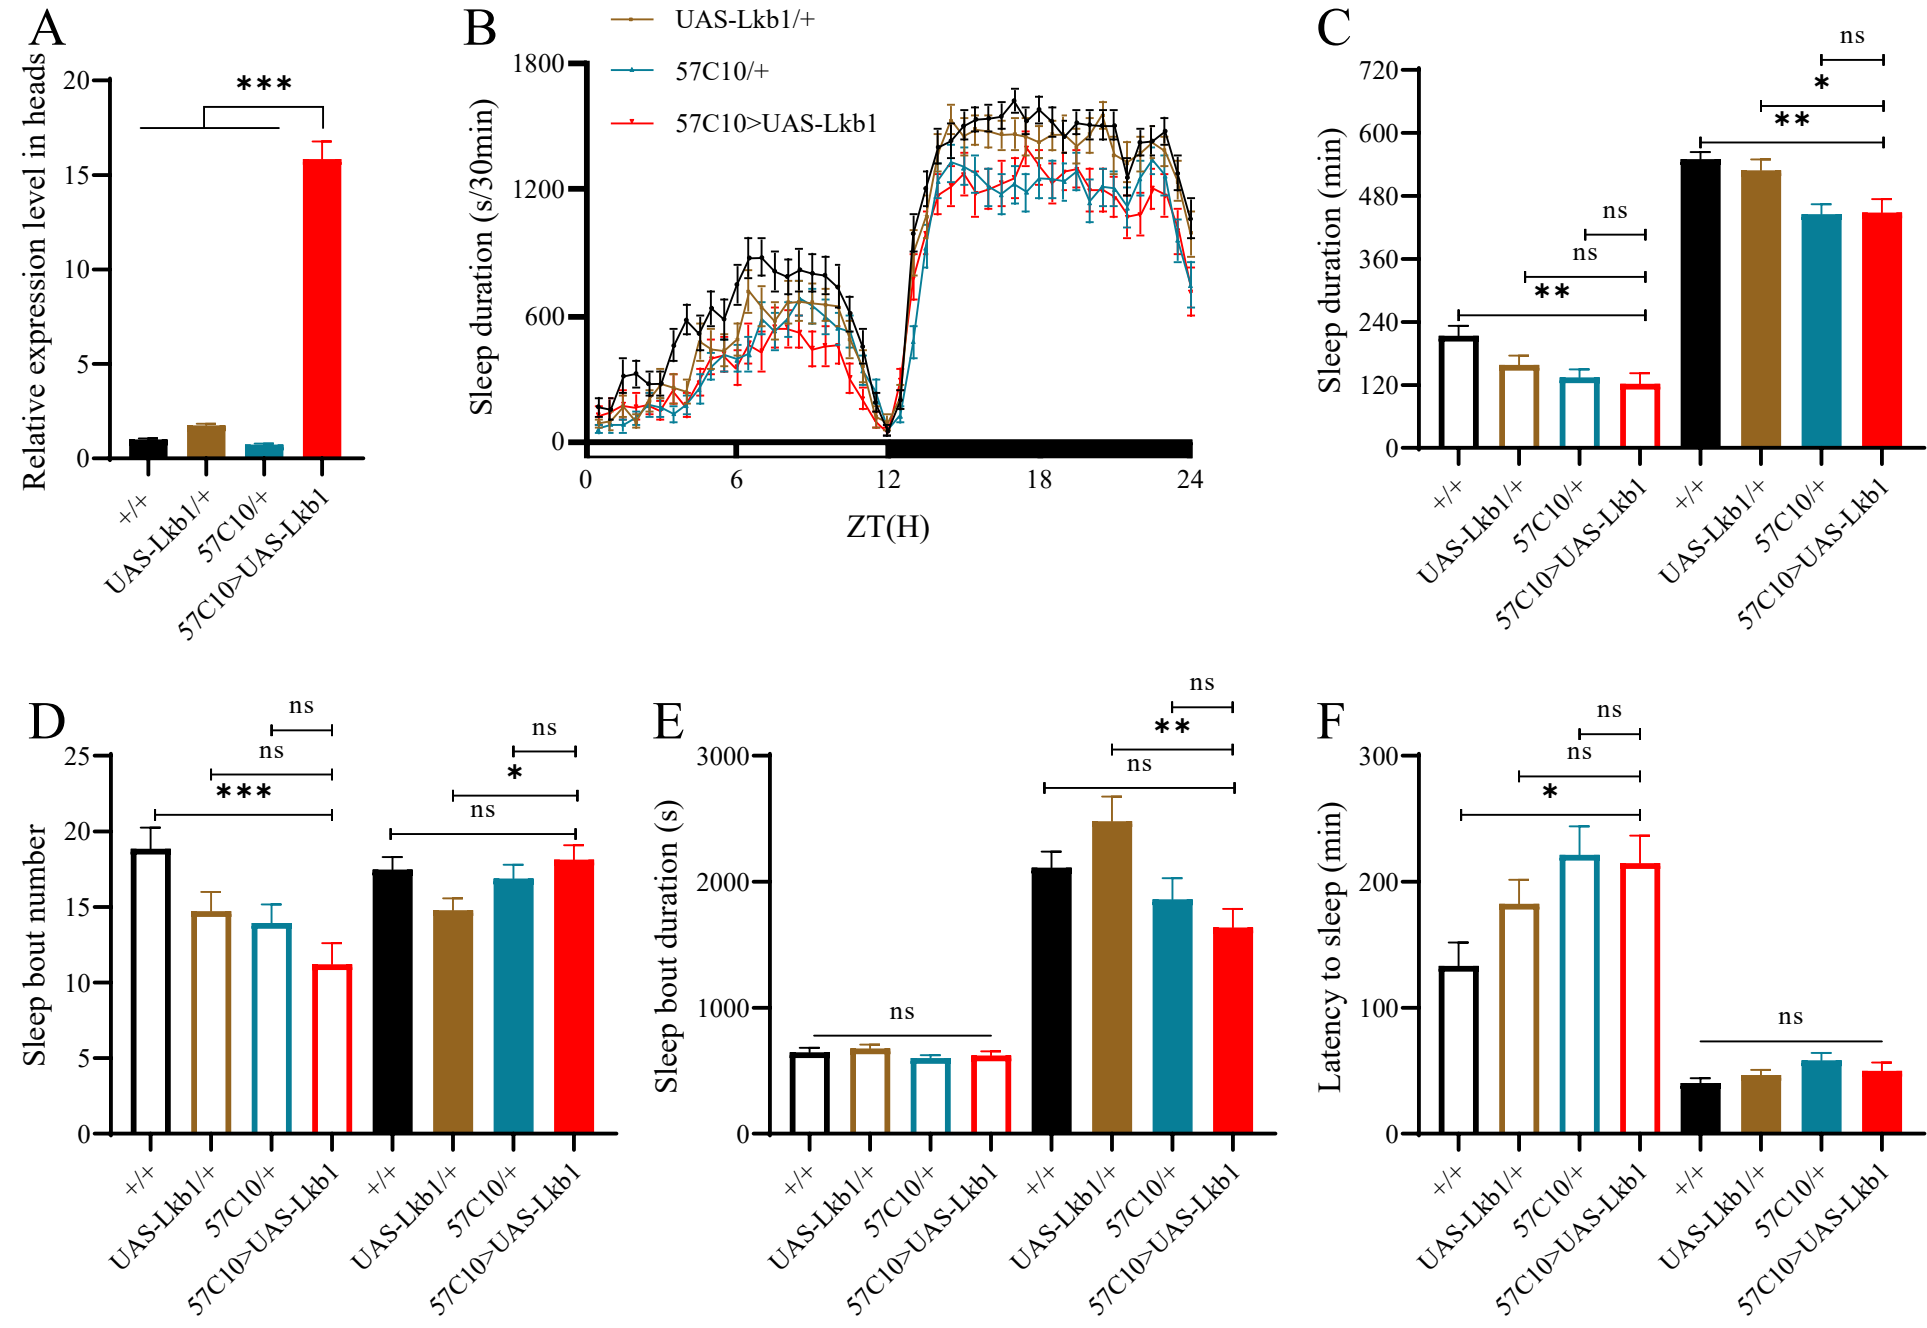

Supplement: iyac082_supplemental_material_5.pdf [file iyac082_supplemental_material_5.pdf]

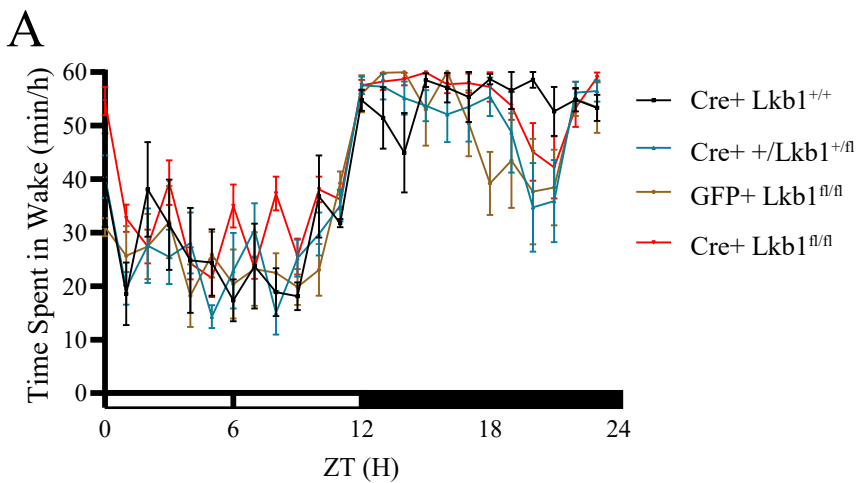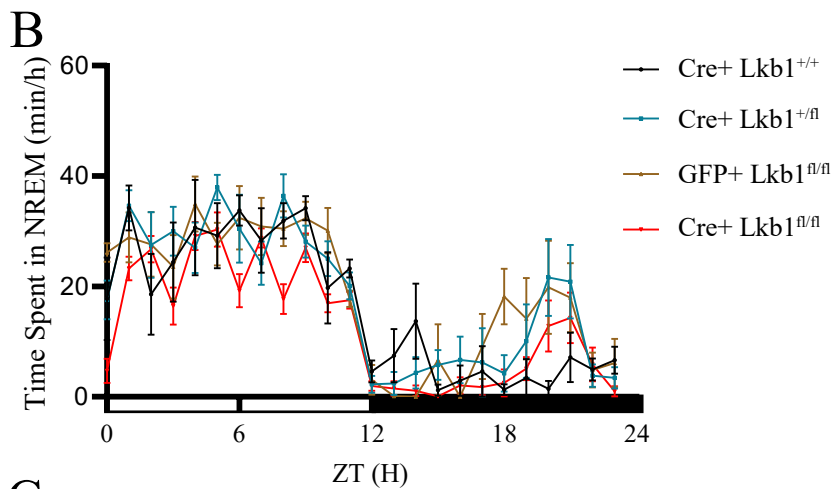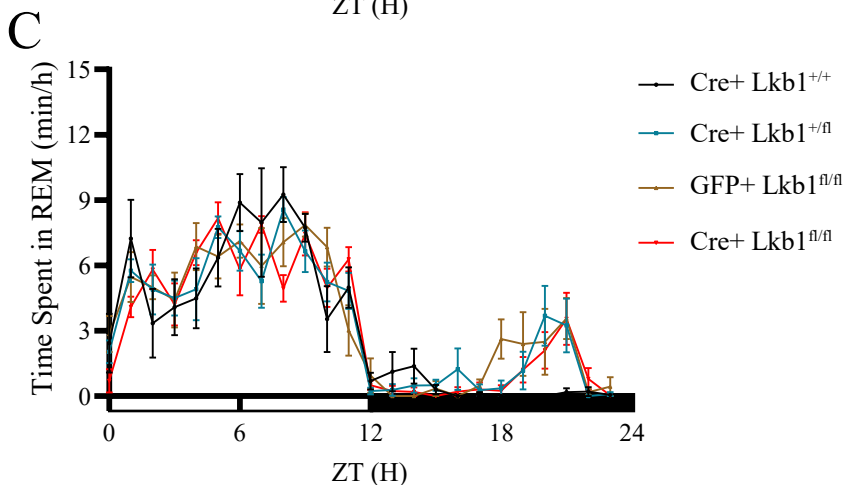

Supplement: iyac082_supplemental_material_6.pdf [file iyac082_supplemental_material_6.pdf]

**A**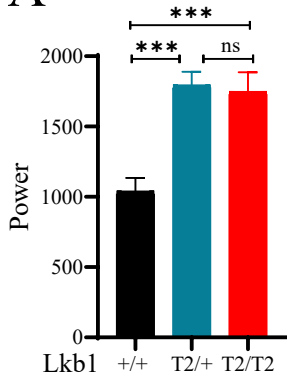**B**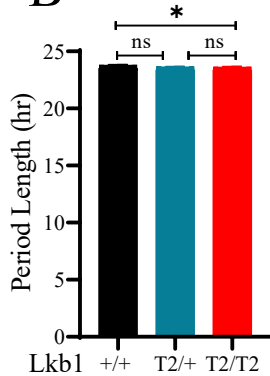**C**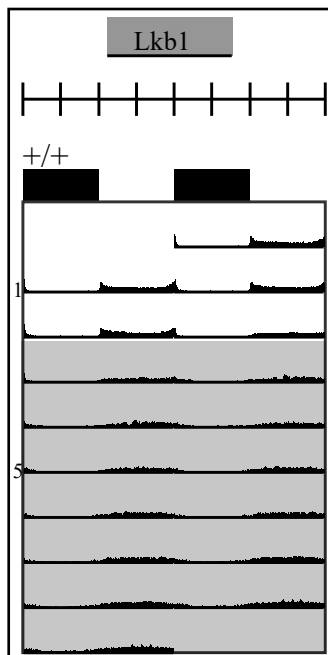**D**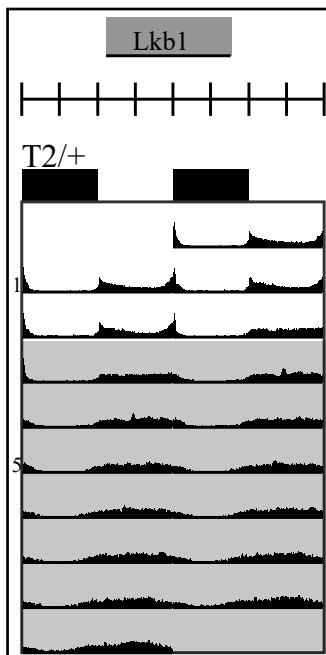**E**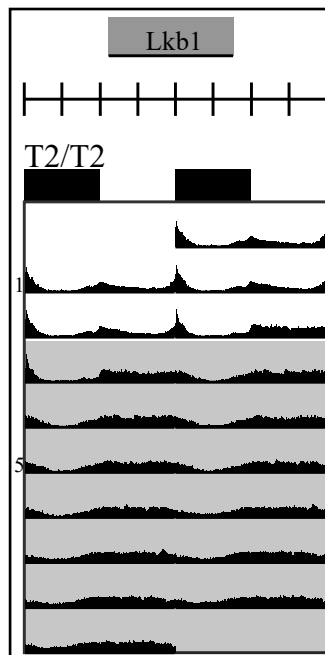

Supplement: iyac082_supplemental_material_7.pdf [file iyac082_supplemental_material_7.pdf]
